# Supplementary material
Source: Springer Nature journal article supplement (https://www.springermedizin.de/resource/supplementary/13045_2011_182_MOESM3_ESM.pdf/9660828)

# C57 BL/6 Foxp3<sup>EGFP</sup>

- ▲ non tumor-bearing control mice
- B16 tumor
- B16 tumor / IL-2
- △ B16-OVA tumor

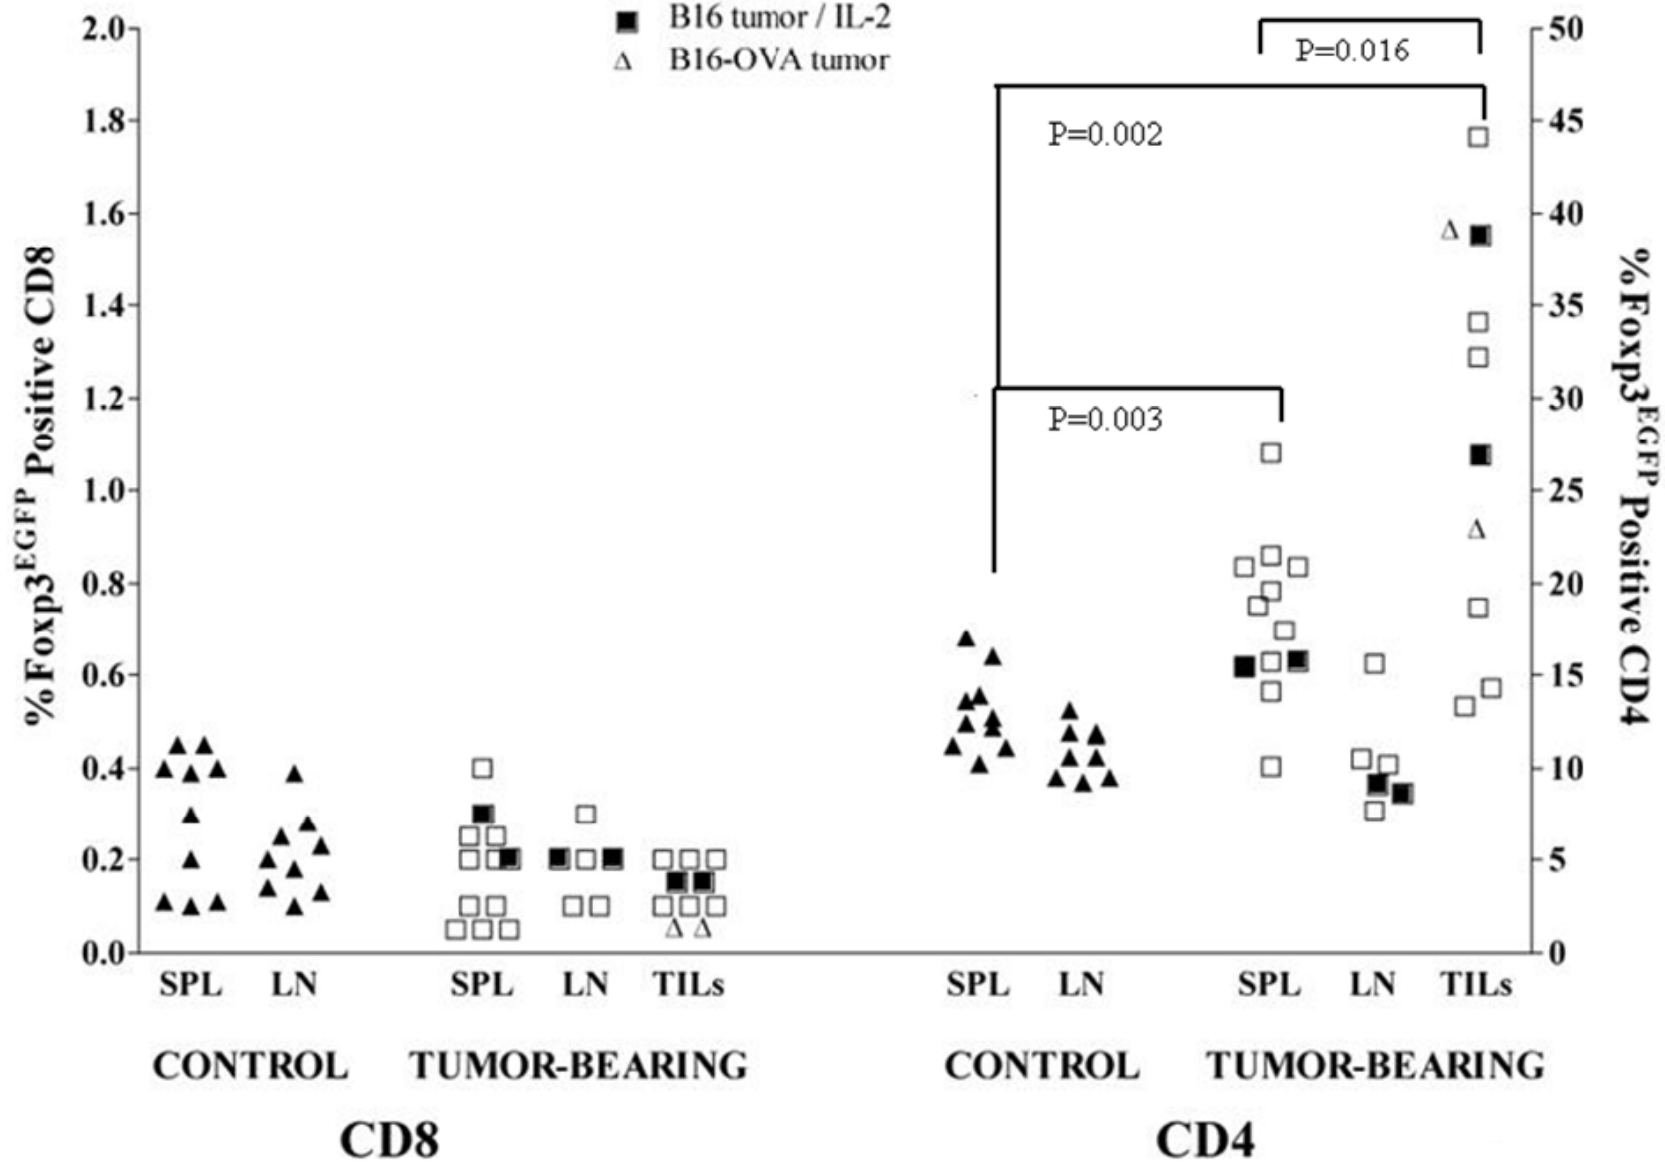

Supplement: MOESM3 [file 9660828]
